# Supplementary material for: Obstetric Facility Quality and Newborn Mortality in Malawi: A Cross-Sectional Study
Source: PLoS Med. 2016 Oct 18;13(10):e1002151. doi: 10.1371/journal.pmed.1002151 (PMC5068819; doi:10.1371/journal.pmed.1002151)
Supplement: S2 Table — (XLSX) [file pmed.1002151.s004.xlsx]

## Sheet: Sheet1
	Rural (N=5846)				Urban (N = 840)
	Quartile of differential distance (km)				Tertiles of differential distance (km)
	Q1	Q2	Q3	Q4	Q1	Q2	Q3
	0 km	0.1-4.43 km	4.44-10.95	>10.96 km	0 km	0.1-2.0 km	2.0-6.8 km
N births	1662	1064	1469	1651	591	101	148
Maternal characteristics
Household wealth: lowest 40%	0.283	0.26	0.248	0.262	0.827	0.833	0.946
Secondary education	0.166	0.147	0.154	0.131	0.491	0.549	0.456
Age < 18 at delivery	0.122	0.14	0.138	0.135	0.132	0.137	0.095
Parity (mean)	3.39	3.35	3.44	3.54	2.64	2.6	2.68
ANC visits - any	0.998	0.992	0.991	0.996	1	0.99	0.98
ANC visits - at least 4	0.464	0.433	0.447	0.458	0.536	0.58	0.545
Distance to nearest delivery facility (mean)	5.12	5.76	4.97	4.41	1.59	2.13	1.42
Infant characteristics
Male	0.511	0.51	0.502	0.511	0.519	0.422	0.571
First birth	0.215	0.253	0.24	0.23	0.308	0.343	0.272
Multiples	0.037	0.038	0.042	0.05	0.064	0.039	0.088
Low birthweight	0.156	0.158	0.172	0.158	0.159	0.225	0.17
Unintended	0.436	0.437	0.444	0.448	0.371	0.412	0.483
