# Supplementary material for: Obstetric Facility Quality and Newborn Mortality in Malawi: A Cross-Sectional Study
Source: PLoS Med. 2016 Oct 18;13(10):e1002151. doi: 10.1371/journal.pmed.1002151 (PMC5068819; doi:10.1371/journal.pmed.1002151)
Supplement: S5 Table — (XLSX) [file pmed.1002151.s007.xlsx]

## Sheet: Sheet1
Model	F test of IV strength	β (95% CI)
1. Hospital delivery 1,2	192.8	-0.020 (-0.053, 0.012)
Instrument: differential distance to nearest hospital
(N = 6697)3
2. High capacity facilities1,2	229.6	-0.019 (-0.047, 0.009)
Top 25% of delivery facilities based cesarean section, inpatient services, pharmacy, lab, blood transfusion, trained staff available 24-hours, and ambulance availability
Instrument: differential distance to high capacity facility
(N = 6668)
1 19 observations with missing values on covariates (18 for infant birthweight, 1 for maternal education) excluded from all analyses
2 Adjusted for: urban, logged number of facilities within 20 kilometers, wealth index quintiles, maternal secondary education, maternal age < 18, male infant, multiple infant, low birthweight infant, primiparous mother
3 29 additional women included who were known to deliver at a hospital but could not be matched to a specific facility based on the SPA facility types. Detailed SPA facility data were not required for this model, unlike all other analyses.
